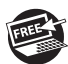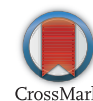

RESPONSE TO COMMENT ON KOIVUSALO ET AL.

# Gestational Diabetes Mellitus Can Be Prevented by Lifestyle Intervention: The Finnish Gestational Diabetes Prevention Study (RADIEL): A Randomized Controlled Trial. *Diabetes Care* 2016;39:24–30

*Diabetes Care* 2016;39:e126–e127 | DOI: 10.2337/dci16-0014

Saila Birgitta Koivusalo,<sup>1</sup>  
Kristiina Rönö,<sup>2</sup>  
Beata Stach-Lempinen,<sup>3</sup>  
and Johan Gunnar Eriksson<sup>4,5</sup>

We would like to thank Dr. Bao (1) for his interest in our gestational diabetes mellitus (GDM) prevention study RADIEL (the Finnish Gestational Diabetes Prevention Study) (2). Because of the globally increasing prevalence of GDM, the findings that GDM can be prevented by a behavioral lifestyle intervention in high-risk women is indeed very promising and important from a public health point of view. Further, it will be of great interest to see whether there will be long-term metabolic advantages among the women and their offspring during a longer follow-up.

Why was the RADIEL study successful? It could be partly due to the slightly different inclusion criteria as compared with those of many other recent randomized controlled intervention trials—specifically, women with a history of GDM were included (3,4). The RADIEL study, however, reminds us also about the heterogeneity of GDM women (5). This phenomenon, although well known among clinicians, has been surprisingly little taken into account when planning strategies for GDM prevention, which may partly explain the inconsistent findings in previous intervention studies. It will be interesting to see whether the long-term effects of the intervention will vary between the different

phenotypic groups of GDM women. One type of intervention is probably not suitable for all high-risk women, although a healthy lifestyle can certainly be recommended for all pregnant women before and during pregnancy.

Interestingly, Bao (1) comments on the possibility of lifestyle intervention initiated in the prepregnancy state and whether this would be more effective than intervention initiated in early pregnancy. We do agree with Bao that this period of life is highly important when aiming at improvements in lifestyle in high-risk women. Although the need for this kind of prepregnancy intervention has been recognized, no study results have been published yet. As Bao noted, the outcomes of interventions initiated in prepregnancy are of major importance and one key research area. Another highly important time point for lifestyle interventions is time after delivery (6). Postpartum counseling reaches women at high risk for diabetes after their delivery and potentially before their next pregnancy, therefore offering an excellent opportunity for future prevention strategies.

Both pregnancy and the first postpartum year are exceptional times for the woman and her family. Targeting pregnant women could therefore potentially

have an impact on the whole family, an opportunity that should not be wasted. Strategies promoting lifestyle improvement during pregnancy and the first postpartum year also provide possibilities for better metabolic health later in life. These kinds of strategies for prevention of adiposity and type 2 diabetes could be applicable to the normal processes in health care systems in many developed countries. We have to keep in mind that prevention is always less expensive than treatment of a disease.

**Duality of Interest.** No potential conflicts of interest relevant to this article were reported.

## References

1. Bao W. Comment on Koivusalo et al. Gestational diabetes mellitus can be prevented by lifestyle intervention: the Finnish Gestational Diabetes Prevention Study (RADIEL): a randomized controlled trial. *Diabetes Care* 2016;39:24–30 (Letter). *Diabetes Care* 2016;39:e125. DOI: 10.2337/dci16-0665
2. Koivusalo SB, Rönö K, Klemetti MM, et al. Gestational diabetes mellitus can be prevented by lifestyle intervention: the Finnish Gestational Diabetes Prevention Study (RADIEL): a randomized controlled trial. *Diabetes Care* 2016;39:24–30
3. Poston L, Bell R, Croker H, et al.; UPBEAT Trial Consortium. Effect of a behavioural intervention

<sup>1</sup>Department of Obstetrics and Gynaecology, University of Helsinki and Helsinki University Hospital, Jorvi Hospital, Espoo, Finland

<sup>2</sup>Department of Obstetrics and Gynaecology, University of Helsinki and Helsinki University Hospital, Women's Hospital, Helsinki, Finland

<sup>3</sup>Department of Obstetrics and Gynaecology, South Karelia Central Hospital, Lappeenranta, Finland

<sup>4</sup>Department of General Practice and Primary Health Care, University of Helsinki and Helsinki University Hospital, Helsinki, Finland

<sup>5</sup>Folkhälsan Research Center, Helsinki, Finland

Corresponding author: Saila Birgitta Koivusalo, saila.koivusalo@helsinki.fi.

© 2016 by the American Diabetes Association. Readers may use this article as long as the work is properly cited, the use is educational and not for profit, and the work is not altered.

in obese pregnant women (the UPBEAT study): a multicentre, randomised controlled trial. *Lancet Diabetes Endocrinol* 2015;3:767–777

4. Simmons D, Jelsma JGM, Galjaard S, et al. Results from a European multicenter randomized trial of physical activity and/or healthy eating to reduce the risk of gestational diabetes

mellitus: the DALI Lifestyle Pilot. *Diabetes Care* 2015;38:1650–1656

5. Huvinen E, Grotenfelt NE, Eriksson JG, et al. Heterogeneity of maternal characteristics and impact on gestational diabetes (GDM) risk-implications for universal GDM screening? *Ann Med* 2016;48:52–58

6. Ferrara A, Heddersson MM, Brown SD, et al. The comparative effectiveness of diabetes prevention strategies to reduce postpartum weight retention in women with gestational diabetes mellitus: the Gestational Diabetes' Effects on Moms (GEM) cluster randomized controlled trial. *Diabetes Care* 2016;39:65–74
